# Supplementary material for: Microfluidic long-term differential oxygenation for bacterial growth characteristics analyses
Source: Royal Society of Chemistry journal article supplement (doi:10.1039/c4ra01577k), 2014-01-01
Supplement: c4ra01577k1.pdf [file c4ra01577k1.pdf]

## **SUPPLEMENTAL MATERIALS**

### **Microfluidic Long-Term Differential Oxygenation for Bacteria Growth Characteristics Analyses**

Xin Cui, Hon Ming Yip, Qian Zhu, Chengpeng Yang, and Raymond H. W. Lam\*

Department of Mechanical and Biomedical Engineering, City University of Hong  
Kong, Hong Kong.

\* Correspondence should be addressed to RHW Lam; email: [rhwlam@cityu.edu.hk](mailto:rhwlam@cityu.edu.hk);  
Tel: 852-3442-8577; Fax: 852-3442-0172.

**SUPPLEMENTAL FIGURES**

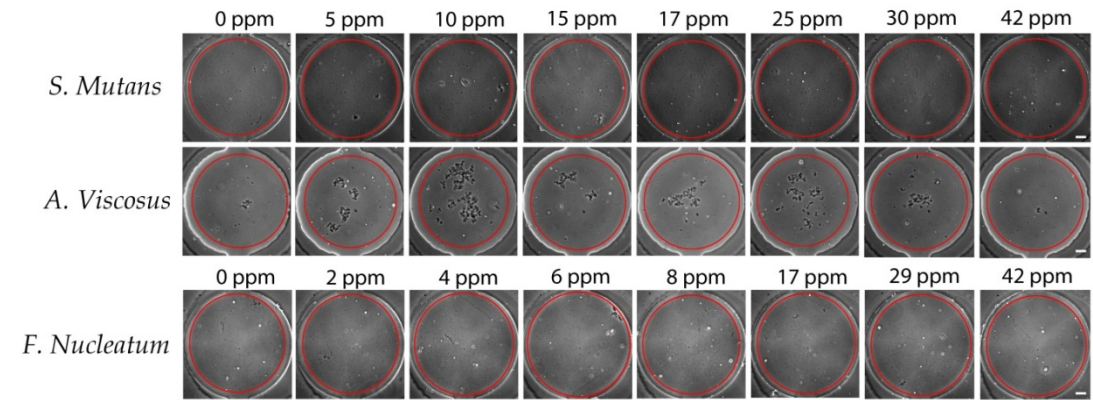

**Fig. S1.** Raw images of cell distributions under eight selected dissolved oxygen levels after long-term (up to one week) culture. The scale bars are 100  $\mu\text{m}$ . The regions within red circles are only considered in image processing.

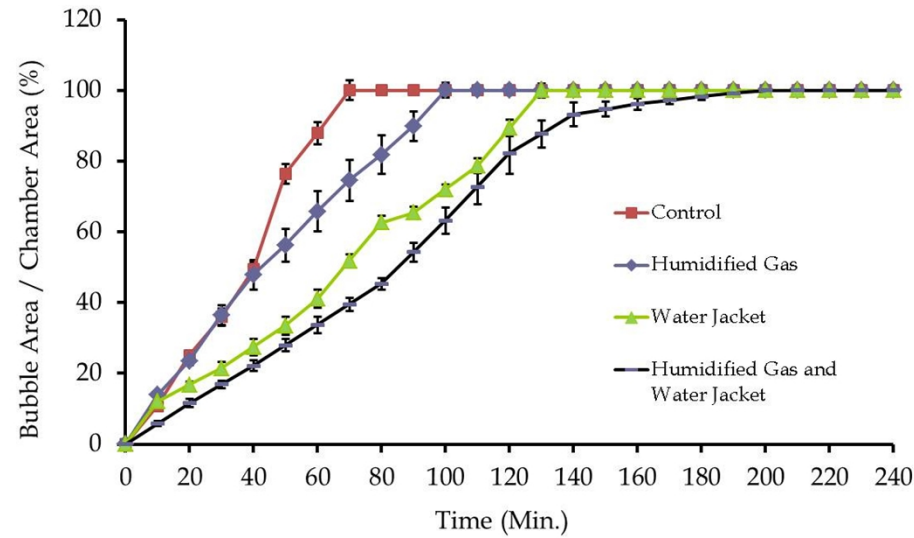

**Fig. S2.** Normalized evaporated areas in a chamber during different humidification approaches. A control experiment was conducted by applying the gas without pre-humidification and a water jacket. Error bars stand for standard errors obtained from three independent experiments.
